# Supplementary material for: The Value of Ultrasound for Detecting and Following Subclinical Interstitial Lung Disease in Systemic Sclerosis
Source: MDPI journal article supplement (doi:10.3390/tomography10040041), 2024-04-03
Supplement: s1 [file s1]

**Supplementary file 1.** Changes in number of the US B-lines at baseline and at the 12 months of follow-up.

| Patient number     | Number of B-lines<br>(baseline) | Number of B-lines<br>(12 months) |
|--------------------|---------------------------------|----------------------------------|
| 1                  | 15                              | 19                               |
| 2                  | 13                              | 25                               |
| 3                  | 2                               | 11                               |
| 4                  | 14                              | 22                               |
| 5                  | 2                               | 11                               |
| 6                  | 1                               | 24                               |
| 7                  | 3                               | 12                               |
| 8                  | 2                               | 11                               |
| 9                  | 0                               | 8                                |
| 10                 | 15                              | 24                               |
| 11                 | 5                               | 11                               |
| 12                 | 2                               | 8                                |
| 13                 | 15                              | 26                               |
| 14                 | 5                               | 21                               |
| 15                 | 2                               | 11                               |
| 16                 | 2                               | 9                                |
| 17                 | 15                              | 21                               |
| 18                 | 5                               | 15                               |
| 19                 | 2                               | 10                               |
| 20                 | 30                              | 34                               |
| 21                 | 2                               | 12                               |
| 22                 | 2                               | 9                                |
| 23                 | 13                              | 24                               |
| 24                 | 14                              | 24                               |
| 25                 | 2                               | 13                               |
| 26                 | 5                               | 18                               |
| 27                 | 2                               | 8                                |
| 28                 | 15                              | 28                               |
| 29                 | 3                               | 13                               |
| 30                 | 4                               | 13                               |
| Mean               | 7.1                             | 16.5                             |
| 95%CI for the mean | 4.52 - 9.74                     | 13.8 -19.19                      |
| SD                 | 6.9                             | 7.2                              |
| p                  | <0.0001                         | <0.0001                          |

95%CI = 95% confidence interval; SD = standard deviation.

**Supplementary file 2.** Borg Dyspnoea scale and pulmonary US progression during 1-year of follow-up.

| Borg Dyspnea Scale, n (%) |            | Pulmonary US score, n (%) |            | <i>p</i> |
|---------------------------|------------|---------------------------|------------|----------|
| Basal                     | 133        | Basal                     | 133        |          |
| 0                         | 111 (83.5) | 0                         | 54 (40.6)  | 0.001    |
| 0.5                       | 22 (16.5)  | 1                         | 51 (38.3)  |          |
| 1                         | 0          | 2                         | 28 (21)    |          |
| 2                         | 0          | 3                         | 0          |          |
| 3                         | 0          | 0                         | 0          |          |
| 3 months                  | 130        | 3 months                  | 130        |          |
| 0                         | 106 (81.4) | 0                         | 51 (39.2)  | 0.001    |
| 0.5                       | 24 (18.6)  | 1                         | 49 (37.7)  |          |
| 1                         | 0          | 2                         | 30 (23.1)  |          |
| 2                         | 0          | 3                         | 0          |          |
| 3                         | 0          | 0                         | 0          |          |
| 6 months                  | 125        | 6 months                  | 125        |          |
| 0                         | 97 (77.40) | 0                         | 45 (36.00) | 0.001    |
| 0.5                       | 25 (20.2)  | 1                         | 49 (39.20) |          |
| 1                         | 3 (2.4)    | 2                         | 31 (24.80) |          |
| 2                         | 0          | 3                         | 0          |          |
| 3                         | 0          | 0                         | 0          |          |
| 9 months                  | 123        | 9 months                  | 123        |          |
| 0                         | 90 (73.2)  | 0                         | 39 (31.71) | 0.001    |
| 0.5                       | 26 (21.1)  | 1                         | 50 (40.65) |          |
| 1                         | 6 (4.9)    | 2                         | 34 (27.64) |          |
| 2                         | 1 (0.8)    | 3                         | 0          |          |
| 3                         | 0          | 0                         | 0          |          |
| 12 months                 | 121        | 12 months                 | 121        |          |
| 0                         | 86 (71.1)  | 0                         | 29 (23.97) | 0.001    |
| 0.5                       | 24 (19.8)  | 1                         | 53 (43.80) |          |
| 1                         | 6 (5.0)    | 2                         | 38 (31.40) |          |
| 2                         | 4 (3.3)    | 3                         | 1 (0.83)   |          |
| 3                         | 1 (0.8)    | 0                         | 0          |          |
